# Supplementary material
Source: PubMed Central journal article supplement (PMC11029554)
Supplement: 262_2013_1441_MOESM1_ESM.pdf [file 262_2013_1441_MOESM1_ESM.pdf]

Supplementary data  
Fig. S1

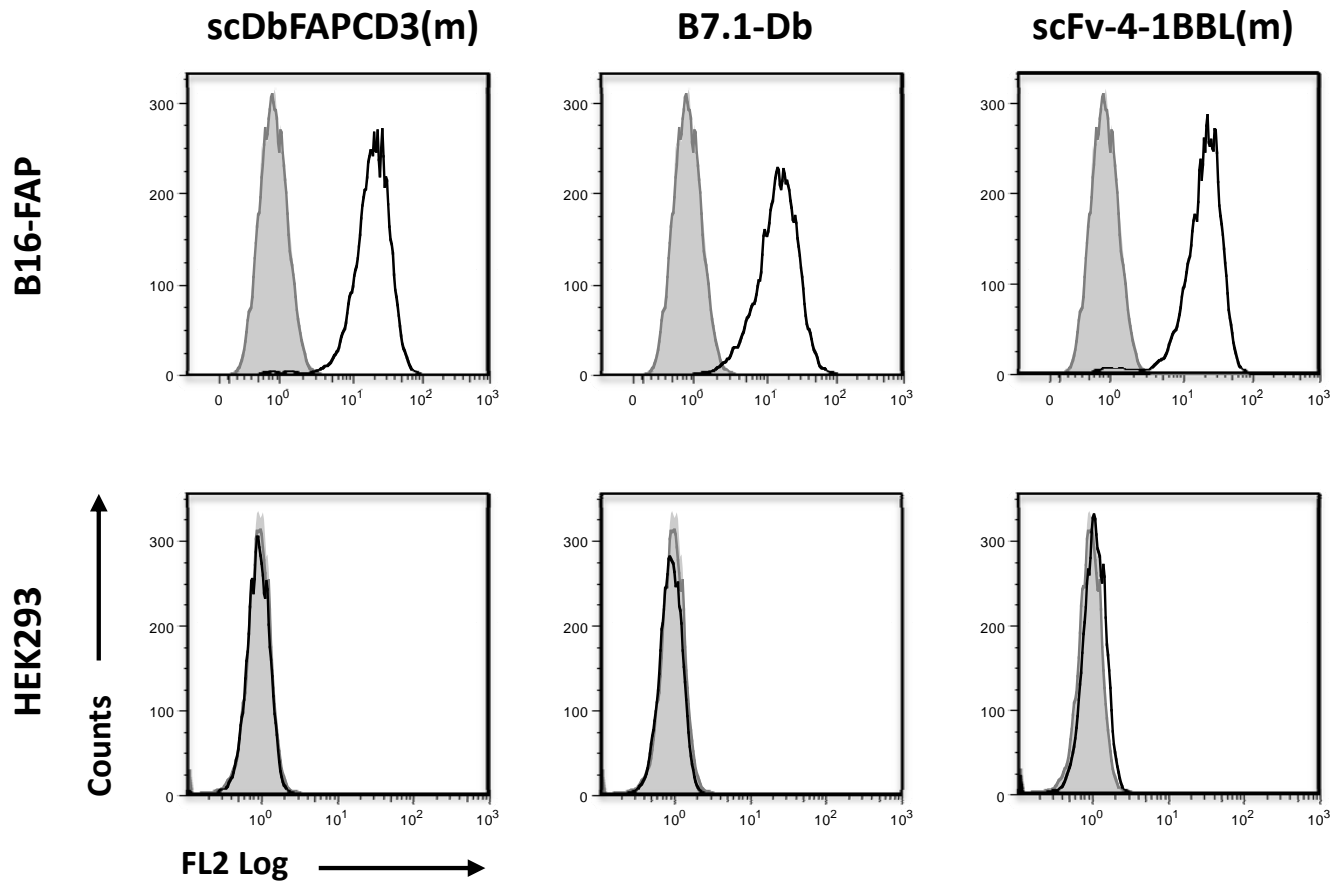

Binding analysis of the antibody fusion proteins scDbFAPCD3(m), B7.1-Db and scFv-4-1BBL(m) by flow cytometry. B16-FAP (hFAP<sup>+</sup>, mEDG<sup>+</sup>) and HEK293 (FAP<sup>-</sup>, EDG<sup>-</sup>) cells were incubated with 10  $\mu$ g/ml fusion protein. Bound construct were detected by an anti-hexahistidyl-tag-PE conjugated antibody. Grey filled: cells only; grey line: detection antibody only; black line: antibody-fusion protein followed by detection antibody.
